# Supplementary material
Source: publisher figshare collection journal article supplement (https://gsajournals.figshare.com/ndownloader/files/13519610)
Supplement: Supplementary file 1 [file 13519610]

## Sheet: column info
gene			gene	gene name
starved_p			starved_p	p value for a 2-sided bootstrap test. Null hypothesis is that the [daf16 or double] mutant has the same mean expression level as [WT or daf-2 mutant] for all temperatures. The effect size of genotype is calculated within each temperature, so it controls for temperature. 10000 permutations of genotype were calculated to get the p-value.
starved_p.adjust			starved_p.adjust	Benjamani-Hotchberg adjusted p-value of the 2-sided bootstrap test.
starved_effect			starved_effect	The mean log2([daf16 or double]/[WT or daf-2] ) across all temperatures.
starved.daf16			starved.daf16	Whether the gene is repressed or activated by daf-16 at a FDR of 5% during starvation.
fed_p			fed_p	p-value for a non-parametric ANCOVA with the null hypothesis that loess lines connecting the points of [daf-16 or double] and [WT or daf-2] are overlapping. This test was implemented using the R package "sm"
fed_p.adjust			fed_p.adjust	Benjamani-Hotchberg adjusted p-value of the non-parametric ANCOVA
fed_effect			fed_effect	The mean log2( [daf16 or double]/[WT or daf-2] ) across all timepoints (note that this might not make sense if lines cross)
fed.daf16			fed.daf16	Whether the gene is repressed or activated by daf-16 at a FDR of 5% during recovery
p.temp			r.temp	Pearson's correlation coefficient for the correlation between temperature and the expression of the gene (pooling across all genotypes).
p.temp.adjust			p.temp	The p-value of a chi-squared goodness of fit test asking whether temperature explained additional variance in gene expression after controlling for genotype
r.temp			p.temp.adjust	Benjamani-Hotchberg adjusted p-value of chi-squared test
temp			temp	Whether the gene is positively or negatively correlated with temperature at a FDR of 5%
Note that the temperature tests are duplicated across tabs

## Sheet: double-vs-daf2
gene	starved_p	starved_p.adjust	starved_effect	starved.daf16	fed_p	fed_p.adjust	fed_effect	fed.daf16	p.temp	p.temp.adjust	r.temp	temp
age-1	0	0	0.87039	repressed	0.00828752	0.0145032	0.496697	repressed	0.174279	0.21262	0.116804	NS
akt-1	0.0007	0.00131923	-0.879753	activated	0.00710901	0.0144512	-0.436615	activated	0.0182382	0.0317867	0.138564	positive
akt-2	0.0012	0.00168	-0.379157	activated	0.00756006	0.0144512	-0.084011	activated	0.00305447	0.0074529	0.361228	positive
daf-16	0.0009	0.001575	-12.5293	activated	0.00520664	0.0144512	-11.9749	activated	0.0250383	0.040842	-0.0649271	negative
daf-2	0	0	0.421064	repressed	0.012962	0.0181468	0.357138	repressed	0.163518	0.203564	-0.123514	NS
daf-28	0	0	0.861805	repressed	0.00772078	0.0144512	1.18071	repressed	0.000222237	0.000797437	-0.356528	negative
ins-1	0	0	0.913001	repressed	0.00691451	0.0144512	0.755967	repressed	6.33783e-05	0.000257738	-0.226388	negative
ins-10	0.3592	0.374485	0.0726225	NS	0.236506	0.269507	0.262085	NS	1.67774e-05	9.30382e-05	0.575908	positive
ins-11	0.4644	0.4644	-0.00689936	NS	0.00633018	0.0144512	0.199855	repressed	8.57081e-06	7.46885e-05	0.688005	positive
ins-12	0.0012	0.00168	-1.40165	activated	0.0162735	0.0209842	-0.0853385	activated	0.0341685	0.053443	0.142703	NS
ins-14	0	0	0.87242	repressed	0.00616854	0.0144512	0.592399	repressed	1.00558e-05	7.66755e-05	-0.283395	negative
ins-16	0.0006	0.00127826	-1.58056	activated	0.00592284	0.0144512	-1.54557	activated	0.121819	0.15539	0.188366	NS
ins-17	0	0	1.35831	repressed	0.00568826	0.0144512	0.928108	repressed	1.60375e-08	4.89143e-07	-0.369992	negative
ins-18	0	0	0.768616	repressed	0.00941406	0.0159065	0.587589	repressed	0.000701088	0.00213832	-0.210247	negative
ins-2	0.2959	0.315198	0.481149	NS	0.97671	0.97671	0.076163	NS	0.122274	0.15539	0.238779	NS
ins-20	0.0031	0.00410541	-1.39414	activated	0.00664454	0.0144512	-0.457766	activated	0.00219836	0.00581553	0.428091	positive
ins-21	0	0	1.03167	repressed	0.0079629	0.0144512	0.672285	repressed	0.697961	0.721621	-0.0160038	NS
ins-22	0.0045	0.00580263	0.720189	repressed	0.26778	0.297557	-0.0339575	NS	0.00215248	0.00581553	-0.352483	negative
ins-24	0.0009	0.001575	-1.51492	activated	0.00531049	0.0144512	-1.5123	activated	6.574e-08	1.33671e-06	-0.511319	negative
ins-25	0.001	0.00158065	-2.39042	activated	0.005396	0.0144512	-2.30011	activated	0.00227404	0.00581553	-0.224988	negative
ins-26	0.0007	0.00131923	-2.08827	activated	0.00583354	0.0144512	-1.77875	activated	0.00228808	0.00581553	0.255889	positive
ins-27	0.0007	0.00131923	-1.32699	activated	0.00637378	0.0144512	-0.900822	activated	1.32487e-05	8.97968e-05	0.540035	positive
ins-28	0	0	1.29324	repressed	0.00744503	0.0144512	0.551846	repressed	6.05278e-05	0.000257738	-0.129627	negative
ins-29	0.0012	0.00168	-0.76322	activated	0.653812	0.686146	-0.22211	NS	0.101507	0.134607	-0.192004	NS
ins-3	0.0022	0.00299444	0.286705	repressed	0.273266	0.297557	0.107186	NS	4.04178e-05	0.000189653	0.590196	positive
ins-30	0.0011	0.00168	-2.78138	activated	0.00568621	0.0144512	-0.91738	activated	1.02549e-06	1.2511e-05	-0.355347	negative
ins-33	0.0209	0.0256025	-0.703636	activated	0.00529916	0.0144512	-1.78301	activated	0.00712911	0.0155313	-0.394919	negative
ins-34	0.2333	0.254038	-0.44457	NS	0.835743	0.853154	-0.43746	NS	0.219284	0.252384	0.150534	NS
ins-35	0.001	0.00158065	-0.718578	activated	0.018051	0.0226794	-0.68008	activated	8.75821e-12	5.34251e-10	-0.76583	negative
ins-4	0	0	1.23808	repressed	0.0753037	0.0878543	-0.298895	NS	0.00067804	0.00213832	0.299224	positive
ins-5	0.1018	0.118767	0.366533	NS	0.0145743	0.0193011	-0.882621	activated	0.000634836	0.00213832	0.543996	positive
ins-6	0.1324	0.147445	0.302942	NS	0.00974115	0.0159105	-0.625705	activated	1.91269e-07	2.91685e-06	0.702268	positive
ins-9	0.0101	0.0126897	1.29391	repressed	0.0576509	0.0706223	0.519542	NS	0.0545053	0.0791624	0.361067	NS
pdk-1	0.001	0.00158065	-0.917941	activated	0.00648734	0.0144512	-0.53081	activated	1.47915e-05	9.02284e-05	-0.110531	negative
skn-1	0	0	0.86807	repressed	0.00657328	0.0144512	0.765406	repressed	3.12769e-05	0.000158991	-0.197373	negative
sod-3	0.0004	0.000890909	-2.67992	activated	0.00574366	0.0144512	-1.5035	activated	0.00318863	0.00748101	0.193106	positive

## Sheet: daf16-vs-wt
gene	starved_p	starved_p.adjust	starved_effect	starved.daf16	fed_p	fed_p.adjust	fed_effect	fed.daf16	p.temp	p.temp.adjust	r.temp	temp
age-1	0	0	0.622081	repressed	0.0789583	0.138177	0.274126	NS	0.174279	0.21262	0.116804	NS
akt-1	0.0042	0.0078037	-0.927844	activated	0.0339976	0.075722	0.130614	NS	0.0182382	0.0317867	0.138564	positive
akt-2	0.0043	0.0078037	-0.287473	activated	0.0162918	0.0562296	0.237265	NS	0.00305447	0.0074529	0.361228	positive
daf-16	0.0039	0.0078037	-12.5852	activated	0.00856209	0.0562296	-12.6176	NS	0.0250383	0.040842	-0.0649271	negative
daf-2	0	0	0.253368	repressed	0.0281257	0.0665201	0.430256	NS	0.163518	0.203564	-0.123514	NS
daf-28	0	0	1.05261	repressed	0.0360267	0.0767526	0.604652	NS	0.000222237	0.000797437	-0.356528	negative
ins-1	0	0	0.75825	repressed	0.0420193	0.0823578	0.417793	NS	6.33783e-05	0.000257738	-0.226388	negative
ins-10	0.0735	0.0900375	0.30731	NS	0.0440131	0.0829477	0.761059	NS	1.67774e-05	9.30382e-05	0.575908	positive
ins-11	0.0427	0.0550605	-0.517925	NS	0.413704	0.53346	0.48406	NS	8.57081e-06	7.46885e-05	0.688005	positive
ins-12	0.0051	0.00833	-1.8505	activated	0.0149671	0.0562296	-0.0355546	NS	0.0341685	0.053443	0.142703	NS
ins-14	0	0	0.396762	repressed	0.348674	0.461757	0.1482	NS	1.00558e-05	7.66755e-05	-0.283395	negative
ins-16	0.0115	0.0176094	-1.01827	activated	0.875516	0.911495	-0.0357278	NS	0.121819	0.15539	0.188366	NS
ins-17	0	0	0.817597	repressed	0.0104342	0.0562296	0.352941	NS	1.60375e-08	4.89143e-07	-0.369992	negative
ins-18	0	0	0.62551	repressed	0.187153	0.277894	0.285026	NS	0.000701088	0.00213832	-0.210247	negative
ins-2	0.0801	0.0957293	-0.61133	NS	0.982645	0.982645	-0.207924	NS	0.122274	0.15539	0.238779	NS
ins-20	0.0982	0.114567	-0.623611	NS	0.892893	0.911495	0.161776	NS	0.00219836	0.00581553	0.428091	positive
ins-21	0.2746	0.288162	0.108151	NS	0.769586	0.87697	-0.0449162	NS	0.697961	0.721621	-0.0160038	NS
ins-22	0.0578	0.0726205	0.253297	NS	0.263433	0.368806	-0.295422	NS	0.00215248	0.00581553	-0.352483	negative
ins-24	0.006	0.00948387	-1.69455	activated	0.0128837	0.0562296	-0.421792	NS	6.574e-08	1.33671e-06	-0.511319	negative
ins-25	0.0049	0.00833	-1.44438	activated	0.0164972	0.0562296	0.0996942	NS	0.00227404	0.00581553	-0.224988	negative
ins-26	0.0033	0.00757273	-1.7223	activated	0.00969144	0.0562296	-1.54916	NS	0.00228808	0.00581553	0.255889	positive
ins-27	0.0341	0.0464139	-0.431518	activated	0.0275599	0.0665201	-0.388627	NS	1.32487e-05	8.97968e-05	0.540035	positive
ins-28	0	0	0.798235	repressed	0.0136124	0.0562296	0.61622	NS	6.05278e-05	0.000257738	-0.129627	negative
ins-29	0.0412	0.0545622	-0.251223	NS	0.211537	0.304862	0.935539	NS	0.101507	0.134607	-0.192004	NS
ins-3	0.5179	0.5179	0.00426697	NS	0.311317	0.423736	0.310323	NS	4.04178e-05	0.000189653	0.590196	positive
ins-30	0.0042	0.0078037	-2.76761	activated	0.0121084	0.0562296	-0.455588	NS	1.02549e-06	1.2511e-05	-0.355347	negative
ins-33	0.0261	0.03654	-0.857096	activated	0.0164122	0.0562296	-0.438744	NS	0.00712911	0.0155313	-0.394919	negative
ins-34	0.1179	0.134351	-0.688197	NS	0.717935	0.85802	-0.543998	NS	0.219284	0.252384	0.150534	NS
ins-35	0.005	0.00833	-0.881317	activated	0.0112093	0.0562296	-0.77815	NS	8.75821e-12	5.34251e-10	-0.76583	negative
ins-4	0	0	2.33791	repressed	0.0221515	0.0638484	0.117841	NS	0.00067804	0.00213832	0.299224	positive
ins-5	0.2344	0.255236	0.384398	NS	0.589171	0.721735	-0.298446	NS	0.000634836	0.00213832	0.543996	positive
ins-6	0.2764	0.288162	-0.138089	NS	0.0127826	0.0562296	-1.00162	NS	1.91269e-07	2.91685e-06	0.702268	positive
ins-9	0.1566	0.174395	-0.36093	NS	0.0407582	0.0823578	-0.130133	NS	0.0545053	0.0791624	0.361067	NS
pdk-1	0.0037	0.0078037	-0.656443	activated	0.474191	0.595779	-0.0879374	NS	1.47915e-05	9.02284e-05	-0.110531	negative
skn-1	0	0	0.590058	repressed	0.0285086	0.0665201	0.423463	NS	3.12769e-05	0.000158991	-0.197373	negative
sod-3	0.0034	0.00757273	-3.35007	activated	0.00980963	0.0562296	-0.518384	NS	0.00318863	0.00748101	0.193106	positive
